# Supplementary material
Source: MDPI journal article supplement (https://www.mdpi.com/2077-0472/8/11/175)
Supplement: s1 [file s1]

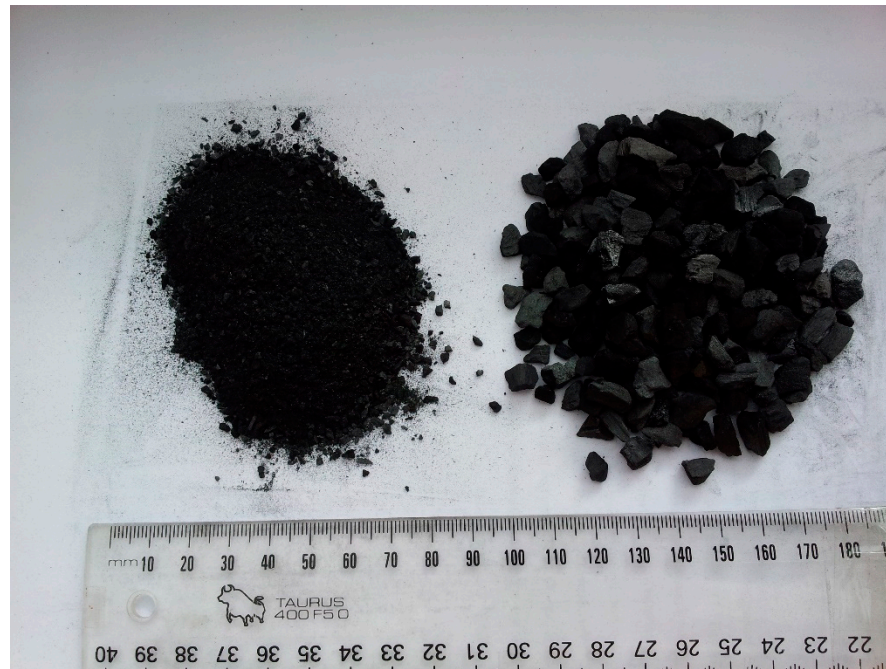

**Figure S1:** <2 mm pine biochar (left) and >4 mm pine biochar (right).

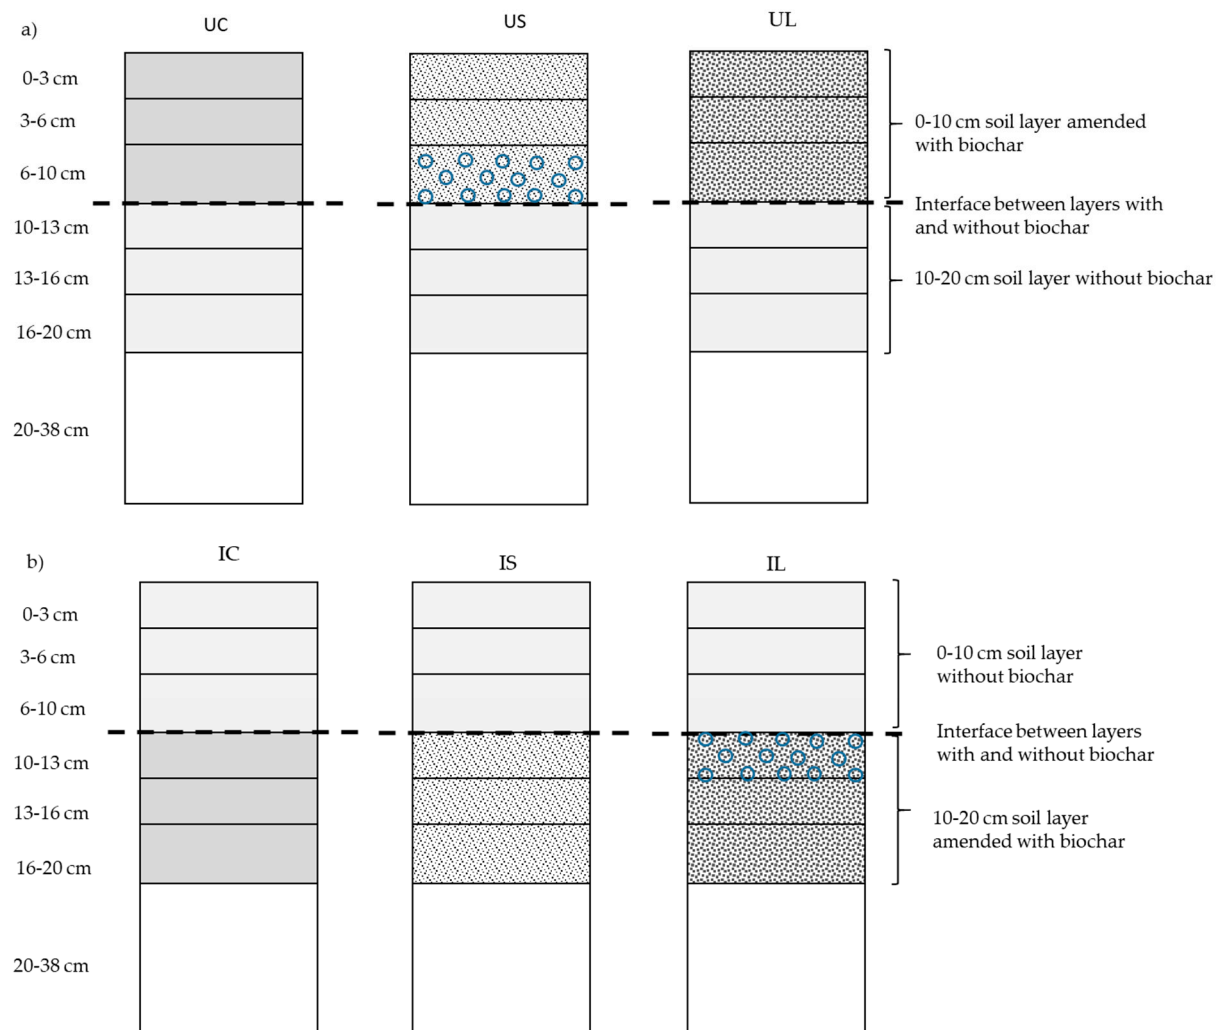

**Figure S2:** The soil in cores was packed as follows: a) Un-inverted soil; UC-control un-inverted; US – Un-inverted 0-10 cm with <2 mm biochar; UL – Un-inverted 0-10 cm with >4 mm biochar; b) Inverted soil; IC- Control inverted; IS- Inverted 0-10 cm with <2 mm biochar; IL - Inverted 0-10 cm with >4 mm biochar.

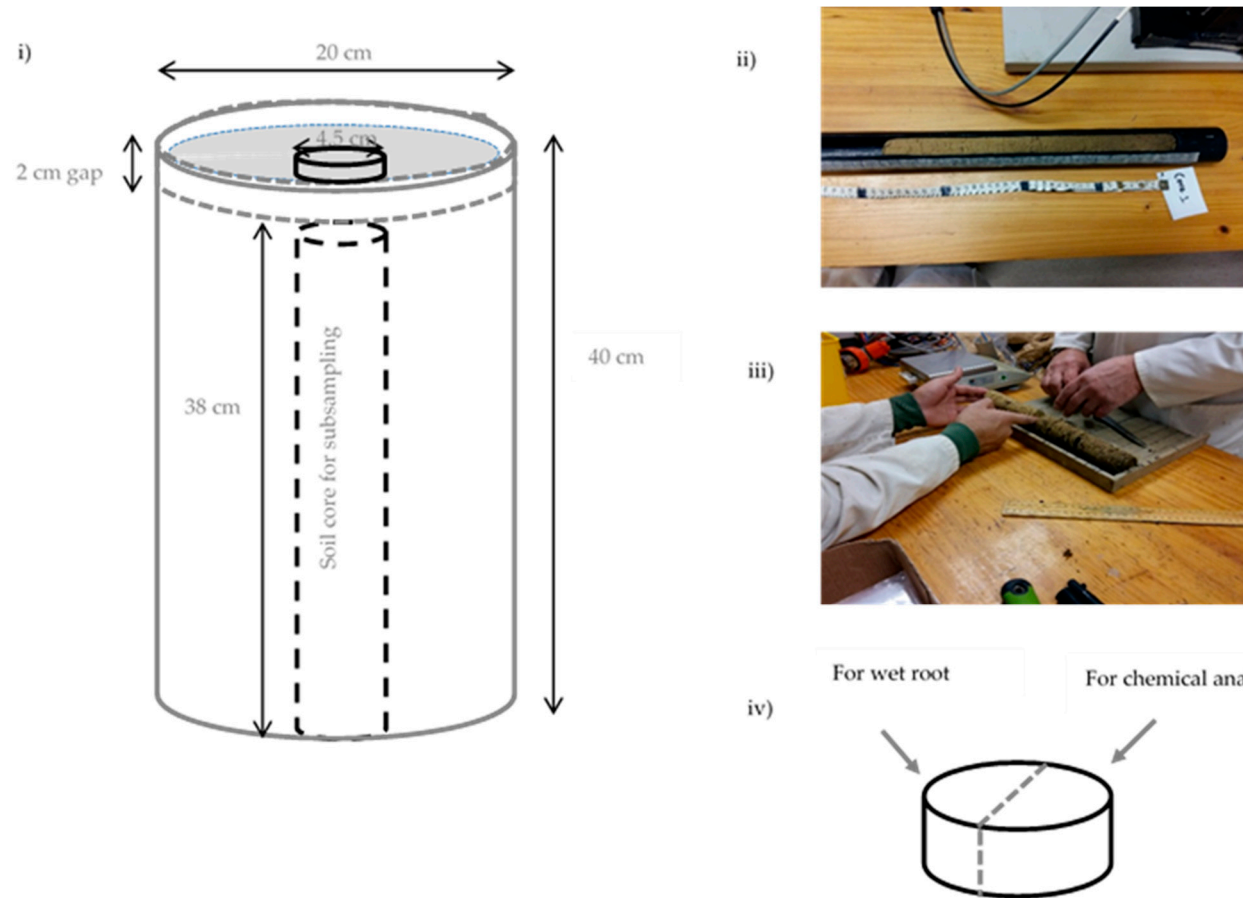

**Figure S3:** End-of-trial sampling; i) A soil core (subsample) was taken out from each core using a corer (diameter of 45 mm) from 0-38 cm depth; ii) Each core was scanned with NIRS; iii) soil was sliced according to designated depth; iv) each sliced soil was cut into half and separated for analysis.

**Table S1:** Time scale of the experiment.

| Date                      | Week             | Event                                                                                                                                                                                                                                                                              |
|---------------------------|------------------|------------------------------------------------------------------------------------------------------------------------------------------------------------------------------------------------------------------------------------------------------------------------------------|
| 26/9/2014                 | 1                | Finish setting up all cores and first irrigation to reach 50% WFPS- topsoil (0-10 cm) has been mixed with basic fertilizer to stimulate seedlings (NPK; 60 kg N ha <sup>-1</sup> ; 50 kg K ha <sup>-1</sup> and 60 kg P ha <sup>-1</sup> ) N from urea, K from KCl and P from SSP. |
| 10/10/2014                | 3                | Sowing ryegrass seeds                                                                                                                                                                                                                                                              |
| 4/11/2014                 | 7                | Thinning to 20 seedlings                                                                                                                                                                                                                                                           |
| 13/11/2014                | 8                | First harvest, cut to 5 cm length                                                                                                                                                                                                                                                  |
| 24/11/2014                | Week 10 & onward | Subsequent harvests                                                                                                                                                                                                                                                                |
| 15/12/2014                | 13               | Gas measurement to measure N <sub>2</sub> O emission prior to urine application: sampling (day 0)- summer trial                                                                                                                                                                    |
| 16/12/2014                | 13               | First application of cow urine equal to 354 kg N ha <sup>-1</sup> , 3.5 mm of urine applied using syringe onto 1/3 of total area of soil core.                                                                                                                                     |
| 17/12/2014 until 3/2/2015 | Weeks 13-20      | Gas measurement day 1 to day 49                                                                                                                                                                                                                                                    |
|                           | Weeks 21-28      | Gap                                                                                                                                                                                                                                                                                |
| 9 and 10/4/2015           | 29               | Leaching before 2 <sup>nd</sup> cow urine application                                                                                                                                                                                                                              |
| 27/4/2015                 | 32               | Gas measurement to measure N <sub>2</sub> O emission prior to urine application: sampling (day 0)-autumn trial                                                                                                                                                                     |
| 28/4/2015                 | 32               | Second application of cow urine equal to 563 kg N ha <sup>-1</sup>                                                                                                                                                                                                                 |
| 29-4-2015 until 16-6-2015 | Weeks 32-39      | Gas measurement day 1 to day 49                                                                                                                                                                                                                                                    |
| 16-9-2015                 | 52               | Experiment setup dismantled. Soil cores were kept in the chiller room for further analysis.                                                                                                                                                                                        |

**Table S2.** Soil pH of each layer measured at the end of the experiment.

| Soil depth (cm)    | Treatments       |       |       |                 |               |       |       |                 |
|--------------------|------------------|-------|-------|-----------------|---------------|-------|-------|-----------------|
|                    | Un-inverted soil |       |       |                 | Inverted soil |       |       |                 |
|                    | UC               | US    | UL    | <i>p</i> -value | IC            | IS    | IL    | <i>p</i> -value |
| Layer A (0-3 cm)   | 5.74a            | 5.72a | 5.68a | 0.906           | 5.68a         | 5.67a | 5.62a | 0.411           |
| Layer B (3-6 cm)   | 5.65a            | 5.34a | 5.43a | 0.068           | 5.43a         | 5.39a | 5.38a | 0.875           |
| Layer C (6-10 cm)  | 5.52a            | 5.43a | 5.34a | 0.481           | 5.29a         | 5.38a | 5.37a | 0.728           |
| Layer D (10-13 cm) | 5.59a            | 5.30a | 5.34a | 0.105           | 5.30a         | 5.42a | 5.38a | 0.745           |
| Layer E (13-16 cm) | 5.54a            | 5.25b | 5.34b | 0.034           | 5.29a         | 5.42a | 5.37a | 0.387           |
| Layer F (16-20 cm) | 5.53a            | 5.25a | 5.38a | 0.203           | 5.40a         | 5.43a | 5.36a | 0.647           |

UC-control un-inverted; US – Un-inverted 0-10 cm with <2 mm biochar; UL – Un-inverted 0-10 cm with >4 mm biochar; IC- Control inverted; IS- Inverted 0-10 cm with <2 mm biochar; IL - Inverted 0-10 cm with >4 mm biochar. Different letters denote significant differences at  $p < 0.10$  between treatments ( $n = 4$ ) for each layer. In the un-inverted soil biochar was at 0-10 cm depth; in the inverted soil biochar was at 10-20 cm depth.

**Table S3.** N<sub>2</sub>O emission fluxes measured during summer and autumn trial (data showed for selected days only).

| Summer Trial                                                   |                |            |                             |                             |
|----------------------------------------------------------------|----------------|------------|-----------------------------|-----------------------------|
| Day                                                            | Soil Inversion | Treatments |                             |                             |
|                                                                |                | Control    | Small-particle size biochar | Large-particle size biochar |
| Day prior to urine application                                 | Un-inverted    | 0.12bB     | 1.51aA                      | 0.50bA                      |
|                                                                | Inverted       | 2.08aA     | 1.63aA                      | 0.19aA                      |
| Day after urine application with maximum N <sub>2</sub> O peak | Un-inverted    | 30.5aA     | 60.7aA                      | 54.2aA                      |
|                                                                | Inverted       | 13.9aA     | 25.4aA                      | 29.1aA                      |
| Day 10 after urine application                                 | Un-inverted    | 3.11aA     | 3.18aA                      | 4.41aA                      |
|                                                                | Inverted       | 2.70aA     | 15.9aA                      | 7.90aA                      |
| Autumn Trial                                                   |                |            |                             |                             |
| Day                                                            | Soil Inversion | Treatments |                             |                             |
|                                                                |                | Control    | Small-particle size biochar | Large-particle size biochar |
| Day prior to urine application                                 | Un-inverted    | 0.76bB     | 4.61aA                      | 3.24aB                      |
|                                                                | Inverted       | 21.8aA     | 4.36bA                      | 24.8aA                      |
| Day after urine application with maximum N <sub>2</sub> O peak | Un-inverted    | 40.9aA     | 85.7aA                      | 69.7aA                      |
|                                                                | Inverted       | 66.9aA     | 59.7aA                      | 93.8aA                      |
| Day 10 after urine application                                 | Un-inverted    | 14.6aA     | 28.6aA                      | 14.1aA                      |
|                                                                | Inverted       | 9.43aA     | 23.4aA                      | 22.7aA                      |

Within a specific season, (i) different small letters within a row indicate differences between biochar treatments ( $n = 4$ ) and  $p < 0.10$ ), and (ii) different uppercase letters within a column indicate differences between un-inverted and inverted treatments ( $n = 4$  and  $p < 0.10$ ).

**Table S2:** Treatment effects on the amount of NO<sub>3</sub>-N measured for every leaching event.

| Leaching event  | NO <sub>3</sub> -N leachate (NO <sub>3</sub> -N g m <sup>-2</sup> / % of added N leached as NO <sub>3</sub> -N) |             |             |                 |             |             |             |                 |
|-----------------|-----------------------------------------------------------------------------------------------------------------|-------------|-------------|-----------------|-------------|-------------|-------------|-----------------|
|                 | UC                                                                                                              | US          | UL          | <i>p</i> -value | IC          | IS          | IL          | <i>p</i> -value |
| 1 <sup>st</sup> | 0.073/0.21a                                                                                                     | 0.036/0.10a | 0.066/0.19a | 0.680           | 0.030/0.08a | 0.035/0.10a | 0.036/0.10a | 0.933           |
| 2 <sup>nd</sup> | 0.015/0.04a                                                                                                     | 0.026/0.07a | 0.018/0.05a | 0.683           | 0.013/0.04a | 0.060/0.17a | 0.021/0.06a | 0.132           |
| 3 <sup>rd</sup> | 0.015/0.03a                                                                                                     | 0.022/0.04a | 0.015/0.03a | 0.634           | 0.020/0.03a | 0.025/0.04a | 0.036/0.06a | 0.426           |

UC - control un-inverted; US – Un-inverted 0-10 cm with <2 mm biochar; UL – un-inverted 0-10 cm with >4 mm biochar; IC - control inverted; IS - inverted 0-10 cm with <2 mm biochar; IL - inverted 0-10 cm with >4 mm biochar. Different letters denote significant differences at  $p < 0.10$  between treatments at each leaching event ( $n = 4$ ).

**Table S3:** Soil bulk density (g/cm<sup>3</sup>) at each depth measured at the end of the experiment.

| Soil depth (cm)    | Treatments       |       |       |                 |               |       |       |                 |
|--------------------|------------------|-------|-------|-----------------|---------------|-------|-------|-----------------|
|                    | Un-inverted soil |       |       |                 | Inverted soil |       |       |                 |
|                    | UC               | US    | UL    | <i>p</i> -value | IC            | IS    | IL    | <i>p</i> -value |
| Layer A (0-3 cm)   | 0.92a            | 0.93a | 0.84a | 0.115           | 1.16a         | 1.06a | 1.12a | 0.271           |
| Layer B (3-6 cm)   | 1.04a            | 0.99a | 0.94a | 0.106           | 1.14a         | 1.19a | 1.18a | 0.792           |
| Layer C (6-10 cm)  | 0.97a            | 1.06a | 0.99a | 0.101           | 1.05a         | 1.17a | 1.08a | 0.186           |
| Layer D (10-13 cm) | 1.18a            | 1.18a | 1.12a | 0.741           | 0.92a         | 0.95a | 1.00a | 0.327           |
| Layer E (13-16 cm) | 1.17a            | 1.10a | 1.11a | 0.599           | 1.00a         | 0.94a | 0.92a | 0.417           |
| Layer F (16-20 cm) | 1.18a            | 1.10a | 1.08a | 0.183           | 1.00a         | 0.91a | 0.93a | 0.267           |

UC - control un-inverted; US – Un-inverted 0-10 cm with <2 mm biochar; UL – un-inverted 0-10 cm with >4 mm biochar; IC - control inverted; IS - inverted 0-10 cm with <2 mm biochar; IL - inverted 0-10 cm with >4 mm biochar. Different letters denote significant differences at  $p < 0.10$  between treatments ( $n = 4$ ) for each layer. In the un-inverted soil biochar was at 0-10 cm depth; in the inverted soil biochar was at 10-20 cm depth.

**Table S4:** Volumetric soil moisture contents (%) at different matric potentials including the available water content (AWC) measured after the end of the experiment.

|                  |                 | Treatments       |             |             |                 |               |             |             |                 |
|------------------|-----------------|------------------|-------------|-------------|-----------------|---------------|-------------|-------------|-----------------|
| Matric potential | Soil depth (cm) | Un-inverted soil |             |             |                 | Inverted soil |             |             |                 |
|                  |                 | UC               | US          | UL          | <i>p</i> -value | IC            | IS          | IL          | <i>p</i> -value |
| -15bar           | 0-3             | 14.79±0.60       | 14.35±0.94  | 14.12±0.91  | ns              | 14.79±0.85    | 14.02±0.12  | 14.61±0.86  | ns              |
|                  | 3-6             | 19.78±0.67       | 19.36±0.78  | 18.58±0.77  | ns              | 17.25±0.15    | 20.34±2.16  | 19.27±2.61  | ns              |
|                  | 6-10            | 17.45b±0.01      | 19.37a±0.62 | 19.11a±0.03 | <b>0.058</b>    | 18.51±6.70    | 18.25±0.60  | 17.25±2.09  | ns              |
|                  | 10-13           | 18.85±1.06       | 19.98±0.10  | 16.46±1.91  | ns              | 14.73b±0.90   | 16.22b±0.50 | 19.68a±0.35 | <b>0.024</b>    |
|                  | 13-16           | 20.45±0.45       | 21.38±0.15  | 19.32±3.11  | ns              | 20.28±0.21    | 16.21±0.82  | 18.52±1.08  | ns              |
|                  | 16-20           | 20.79±0.62       | 20.81±0.12  | 19.49±1.75  | ns              | 20.73±0.75    | 17.32±0.91  | 18.64±1.94  | ns              |
| -1bar            | 0-3             | 21.62±0.85       | 21.40±1.82  | 19.82±1.28  | ns              | 19.98±1.34    | 19.22±0.17  | 19.96±0.98  | ns              |
|                  | 3-6             | 26.17±0.27       | 24.89±2.21  | 23.45±1.02  | ns              | 22.72±2.07    | 24.67±2.50  | 23.15±2.81  | ns              |
|                  | 6-10            | 22.81b±0.14      | 27.81a±0.88 | 24.01b±0.37 | <b>0.016</b>    | 15.43±1.02    | 22.15±1.01  | 20.74±2.52  | ns              |
|                  | 10-13           | 26.16±1.93       | 26.96±0.88  | 22.37±2.60  | ns              | 20.43b±0.95   | 21.66b±0.81 | 24.77a±0.28 | <b>0.053</b>    |
|                  | 13-16           | 24.20±0.22       | 25.72±0.12  | 22.79±3.63  | ns              | 24.00±1.04    | 20.99±1.53  | 22.86±1.18  | ns              |
|                  | 16-20           | 24.05±1.46       | 21.13±2.53  | 21.92±2.31  | ns              | 24.71±0.61    | 20.76±0.92  | 23.13±1.70  | ns              |
| -0.3 bar         | 0-3             | 27.31±1.08       | 26.99±2.18  | 24.58±1.67  | ns              | 26.36±1.99    | 24.92±0.01  | 26.15±1.01  | ns              |
|                  | 3-6             | 34.22±0.49       | 32.06±1.72  | 30.68±0.01  | ns              | 27.66±0.25    | 32.72±2.87  | 30.71±3.15  | ns              |
|                  | 6-10            | 28.76b±0.41      | 34.04a±1.24 | 30.06b±0.02 | <b>0.032</b>    | 19.57±1.43    | 28.07±1.01  | 26.49±3.00  | ns              |
|                  | 10-13           | 32.16±5.09       | 29.68±1.03  | 25.44±3.24  | ns              | 23.52b±1.25   | 25.24b±0.72 | 28.99a±1.13 | <b>0.074</b>    |
|                  | 13-16           | 29.07±0.27       | 29.23±0.08  | 26.85±4.42  | ns              | 29.45±0.40    | 25.15±1.99  | 26.74±1.42  | ns              |
|                  | 16-20           | 30.51±0.98       | 28.32±0.51  | 27.51±2.83  | ns              | 28.89±0.50    | 26.61±1.01  | 27.57±2.37  | ns              |
| AWC              | 0-3             | 12.52±0.48       | 12.64±1.24  | 10.46±0.76  | ns              | 11.58±1.14    | 10.90±0.12  | 11.55±0.16  | ns              |
|                  | 3-6             | 14.45±0.19       | 12.69±0.94  | 12.10±0.76  | ns              | 10.42±0.10    | 12.39±0.72  | 11.44±0.54  | ns              |
|                  | 6-10            | 11.31±0.40       | 14.68±1.86  | 10.94±0.05  | ns              | 4.38±1.94     | 9.82±0.41   | 9.24±0.91   | ns              |
|                  | 10-13           | 13.31±4.04       | 9.70±0.93   | 8.98±1.32   | ns              | 8.79±0.35     | 9.02±0.22   | 9.31±0.78   | ns              |
|                  | 13-16           | 8.63±0.19        | 7.85±0.23   | 7.53±1.32   | ns              | 9.17±0.20     | 8.94±1.17   | 8.21±0.35   | ns              |
|                  | 16-20           | 9.73±0.36        | 7.51±0.39   | 8.02±1.08   | ns              | 8.17±0.25     | 9.30±0.10   | 8.93±0.44   | ns              |



UC-control un-inverted; US – Un-inverted 0-10 cm with <2 mm biochar; UL – Un-inverted 0-10 cm with >4 mm biochar; IC- Control inverted; IS- Inverted 0-10 cm with <2mm biochar; IL - Inverted 0-10 cm with >4 mm biochar. SEM ( $n = 4$ ) and significant differences were detected at  $p < 0.10$ . Different letters denote significant differences between treatments for each layer. In the un-inverted soil biochar was at 0-10 cm depth; in the inverted soil biochar was at 10-20 cm depth.

**Table S5:** Soil total C (%) of each layer measured at the end of the experiment.

| Soil depth (cm)    | Treatments       |        |        |                 |               |        |        |                 |
|--------------------|------------------|--------|--------|-----------------|---------------|--------|--------|-----------------|
|                    | Un-inverted soil |        |        |                 | Inverted soil |        |        |                 |
|                    | UC               | US     | UL     | <i>p</i> -value | IC            | IS     | IL     | <i>p</i> -value |
| Layer A (0-3 cm)   | 3.85 b           | 5.64 a | 5.23 a | <b>0.000</b>    | 2.49a         | 2.47a  | 2.33a  | 0.187           |
| Layer B (3-6 cm)   | 3.76 b           | 5.18 a | 4.91 a | <b>0.000</b>    | 2.27a         | 2.34a  | 2.35a  | 0.176           |
| Layer C (6-10 cm)  | 3.23 b           | 4.93 a | 4.77 a | <b>0.001</b>    | 2.32a         | 2.30a  | 2.32a  | 0.900           |
| Layer D (10-13 cm) | 2.30a            | 2.30a  | 2.31a  | 0.971           | 3.42 b        | 5.04 a | 4.79 a | <b>0.003</b>    |
| Layer E (13-16 cm) | 2.24a            | 2.29a  | 2.29a  | 0.299           | 3.61 c        | 5.20 a | 4.58 b | <b>0.000</b>    |
| Layer F (16-20 cm) | 1.96a            | 2.17a  | 2.30a  | 0.100           | 3.24 c        | 5.22 a | 4.09 b | <b>0.000</b>    |

UC - control un-inverted; US – Un-inverted 0-10 cm with <2 mm biochar; UL – un-inverted 0-10 cm with >4 mm biochar; IC - control inverted; IS - inverted 0-10 cm with <2 mm biochar; IL - inverted 0-10 cm with >4 mm biochar. Different letters denote significant differences at  $p < 0.10$  between treatments ( $n = 4$ ) for each layer. In the un-inverted soil, biochar was at 0-10 cm depth; in the inverted soil biochar was at 10-20 cm depth.

**Table S6:** Dry root (mg cm<sup>-3</sup>) in each soil layer measured at the end of the experiment.

| Soil depth (cm)    | Treatments       |        |       |                 |               |        |        |                 |
|--------------------|------------------|--------|-------|-----------------|---------------|--------|--------|-----------------|
|                    | Un-inverted soil |        |       |                 | Inverted soil |        |        |                 |
|                    | UC               | US     | UL    | <i>p</i> -value | IC            | IS     | IL     | <i>p</i> -value |
| Layer A (0-3 cm)   | 5.61a            | 10.99a | 5.61a | 0.522           | 5.83a         | 9.87a  | 7.63a  | 0.415           |
| Layer B (3-6 cm)   | 4.04a            | 1.35a  | 3.59a | 0.318           | 1.57a         | 0.90a  | 1.79a  | 0.539           |
| Layer C (6-10 cm)  | 0.68a            | 0.85a  | 0.85a | 0.908           | 0.34 a        | 1.88 b | 1.54 b | <b>0.078</b>    |
| Layer D (10-13 cm) | 0.45a            | 0.67a  | 0.90a | 0.192           | 2.69 a        | 1.12 b | 0.67 b | <b>0.009</b>    |
| Layer E (13-16 cm) | 0.45a            | 0.43a  | 0.44a | 1.000           | 0.67a         | 0.90a  | 0.89a  | 0.898           |
| Layer F (16-20 cm) | 0.34a            | 0.33a  | 0.51a | 0.829           | 0.34a         | 0.51a  | 0.85a  | 0.563           |

UC - control un-inverted; US – Un-inverted 0-10 cm with <2 mm biochar; UL – un-inverted 0-10 cm with >4 mm biochar; IC - control inverted; IS - inverted 0-10 cm with <2 mm biochar; IL - inverted 0-10 cm with >4 mm biochar. Different letters denote significant differences at  $p < 0.10$  between treatments ( $n = 4$ ) for each layer. In the un-inverted soil, biochar was at 0-10 cm depth; in the inverted soil biochar was at 10-20 cm depth.
